# Supplementary material for: Measurements of morphodynamics of a sheltered beach along the Dutch Wadden Sea
Source: Copernicus journal article supplement (doi:10.5194/essd-2023-345), 2023-10-10
Supplement: Supplementary file [file essd-2023-345-RC2-supplement.pdf]

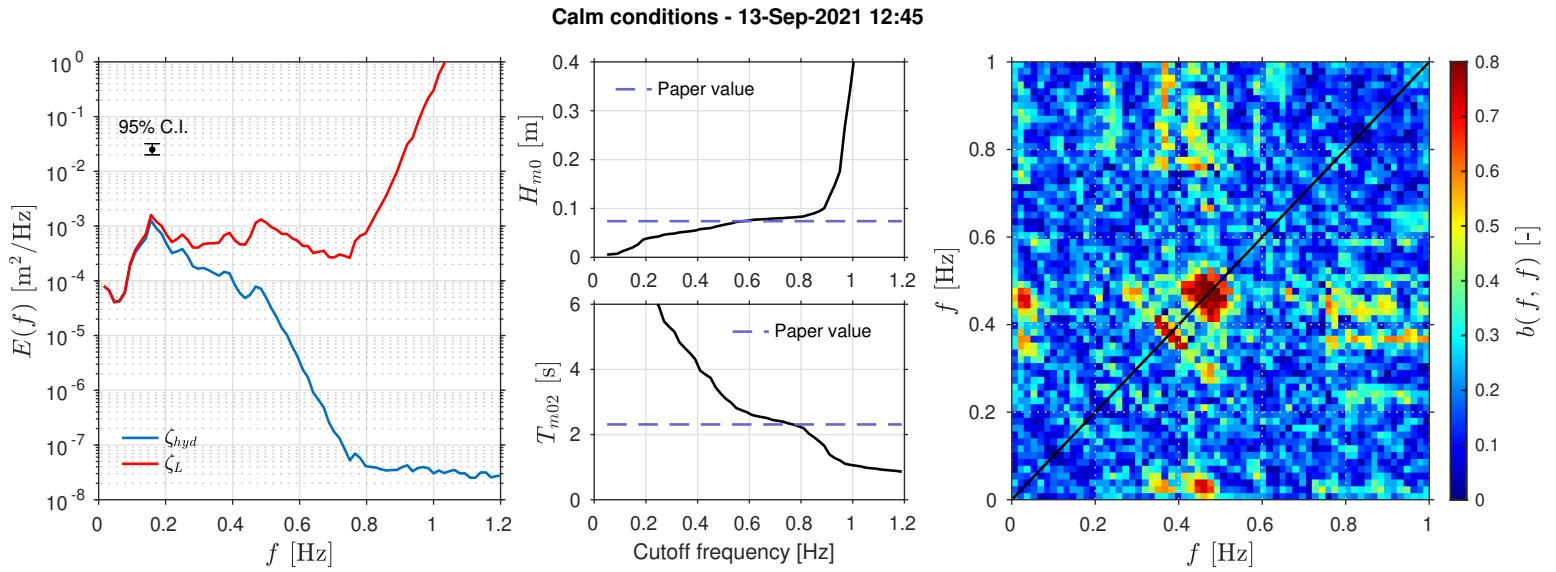

Figure 1: Reconstruction analysis for the calm conditions of 13 September 2021 at 12:45. The left panel shows the surface elevation energy density spectra  $E$  for the two reconstructions (hydrostatic and linear). The central panels show the sensitivity of the bulk parameters  $H_{m0}$  and  $T_{m02}$  to the choice of the high cutoff frequency in the integral for computing moments. The right panel shows the bicoherence of the hydrostatic reconstruction.

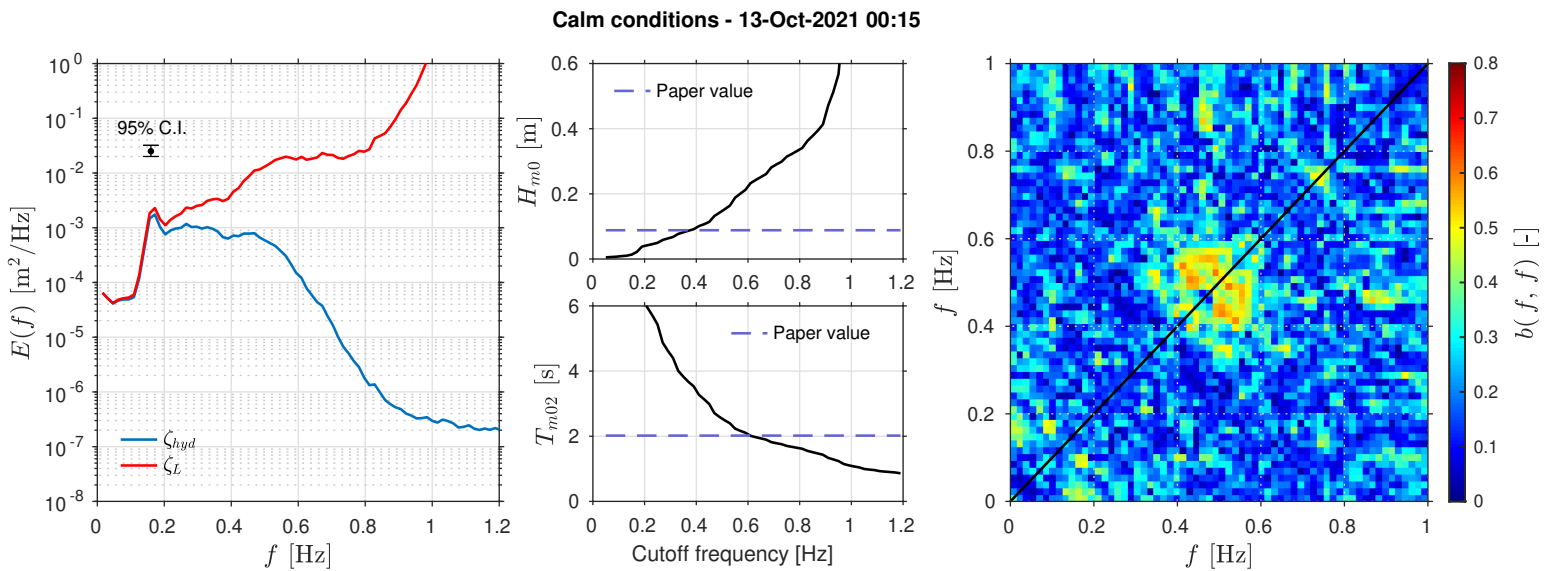

Figure 2: Reconstruction analysis for the calm conditions of 13 October 2021 at 00:15. The left panel shows the surface elevation energy density spectra  $E$  for the two reconstructions (hydrostatic and linear). The central panels show the sensitivity of the bulk parameters  $H_{m0}$  and  $T_{m02}$  to the choice of the high cutoff frequency in the integral for computing moments. The right panel shows the bicoherence of the hydrostatic reconstruction.

Energetic conditions - 19-Sep-2021 08:15

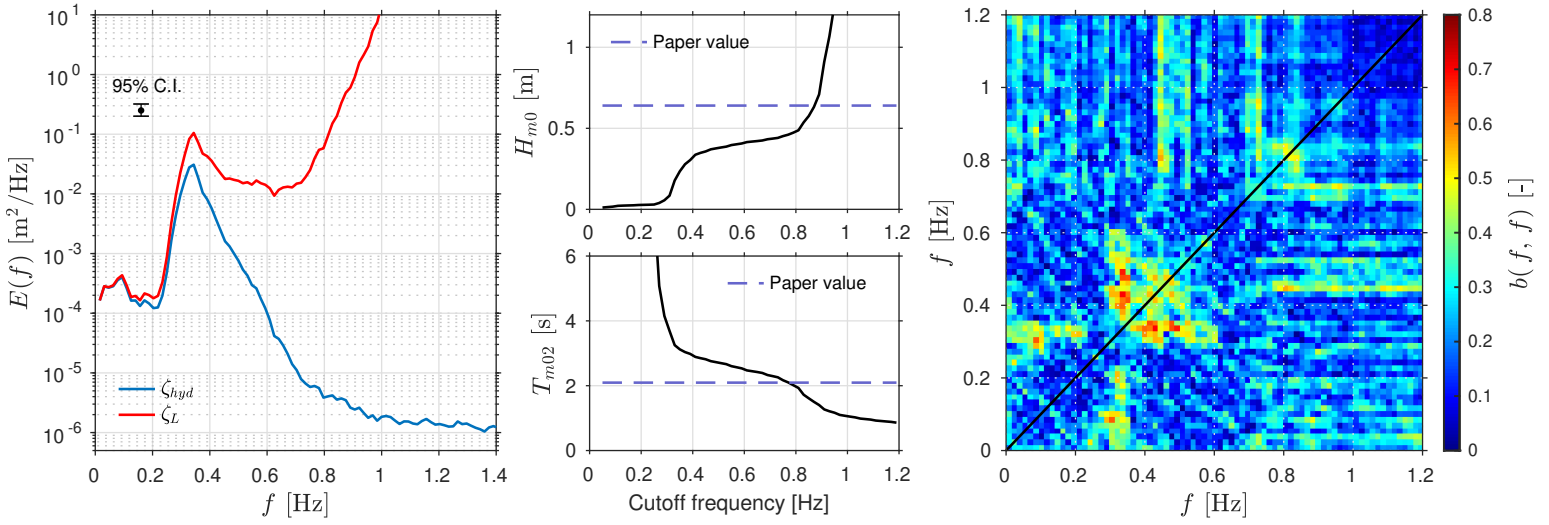

Figure 3: Reconstruction analysis for the energetic conditions of 19 September 2021 at 08:15 (conditions of Figure 8 in the paper). The left panel shows the surface elevation energy density spectra  $E$  for the two reconstructions (hydrostatic and linear). The central panels shows the sensitivity of the bulk parameters  $H_{m0}$  and  $T_{m02}$  to the choice of the high cutoff frequency in the integral for computing moments. The right panel shows the bicoherence of the hydrostatic reconstruction.

Energetic conditions - 01-Oct-2021 02:45

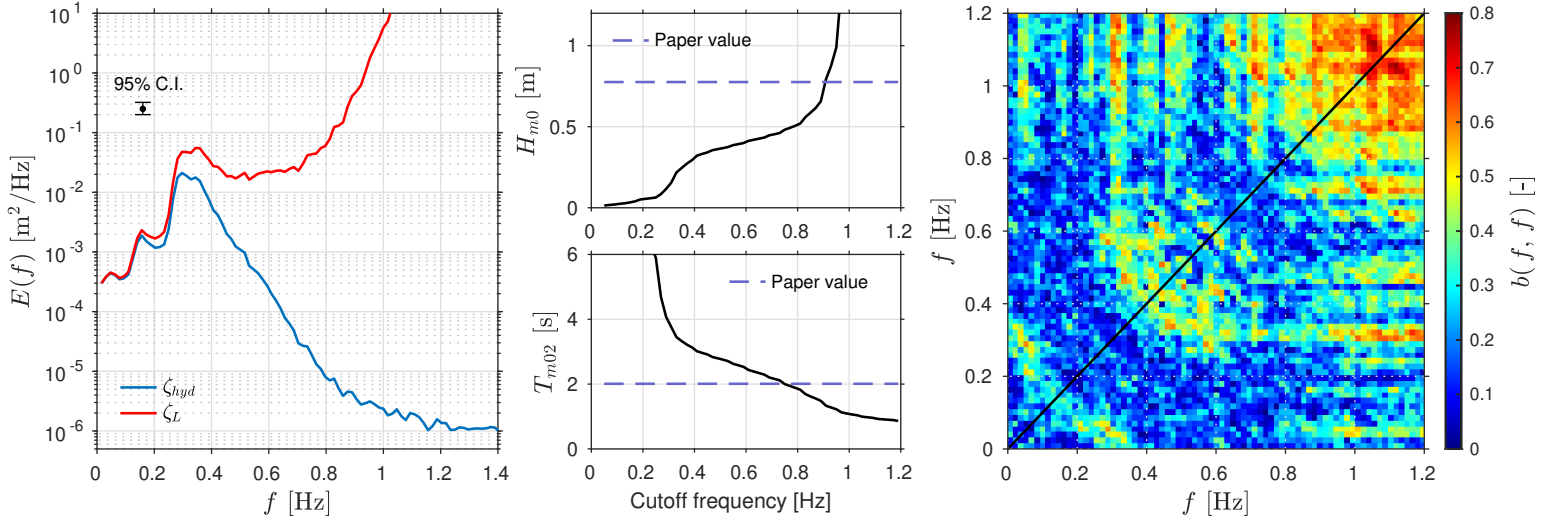

Figure 4: Reconstruction analysis for the energetic conditions of 1 October 2021 at 02:45. The left panel shows the surface elevation energy density spectra  $E$  for the two reconstructions (hydrostatic and linear). The central panels shows the sensitivity of the bulk parameters  $H_{m0}$  and  $T_{m02}$  to the choice of the high cutoff frequency in the integral for computing moments. The right panel shows the bicoherence of the hydrostatic reconstruction.
